# Supplementary material for: Wettability and permeation of ethanol/water mixture on porous mesh surface
Source: Royal Society of Chemistry journal article supplement (doi:10.1039/c6ra19737j), 2016-01-01
Supplement: c6ra19737j1.pdf [file c6ra19737j1.pdf]

## Wettability and Permeation of Ethanol/water Mixture on Porous Mesh Surface

Liping Heng,<sup>a, b</sup> Jie Liu,<sup>a</sup> Ruixiang Hu,<sup>\*a</sup> Ke-Yu Han,<sup>a, b</sup> Lian-Lian Guo,<sup>a</sup>

Ye Liu,<sup>a</sup> Meng-Ying Li,<sup>a</sup> Qiao Nie<sup>a</sup>

*a College of Chemistry and Chemical Engineering, Hunan Normal University, Changsha, Hunan Province 410081, China*

*b School of Chemistry and Environment, Beihang University, Beijing 100191, China*

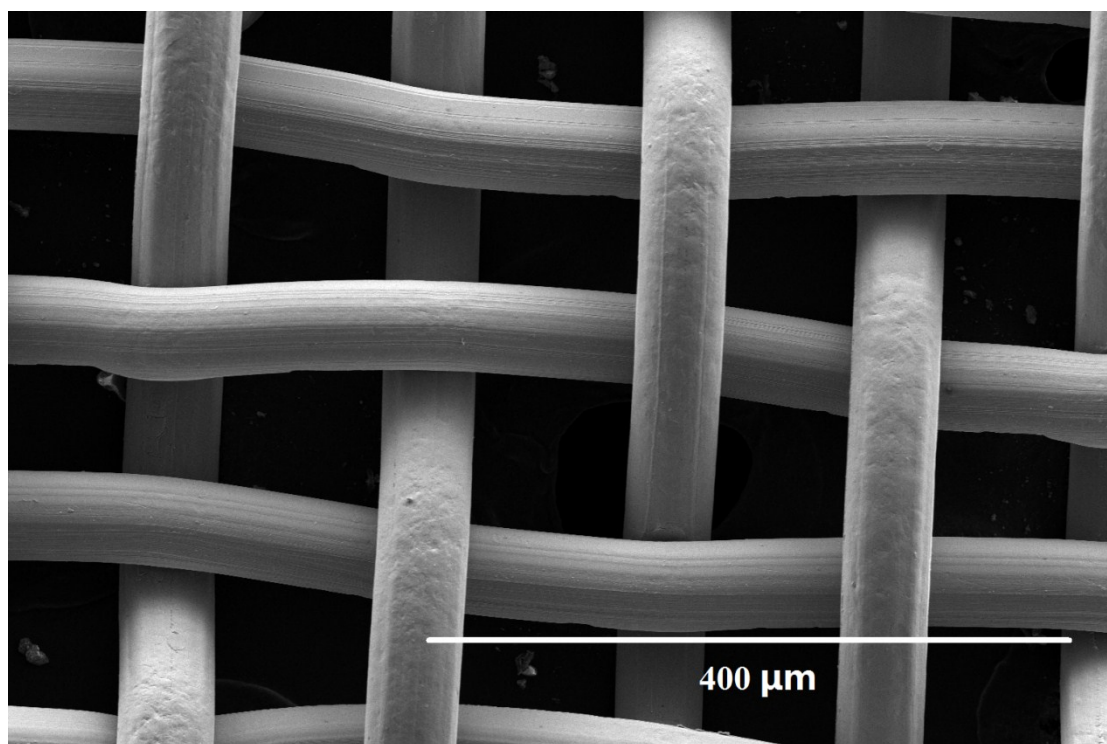

Figure S1 Low magnification SEM image of the Cu mesh, the diameter of copper wire is about 51  $\mu\text{m}$  and the average width of a square in the mesh is about 85  $\mu\text{m}$ .

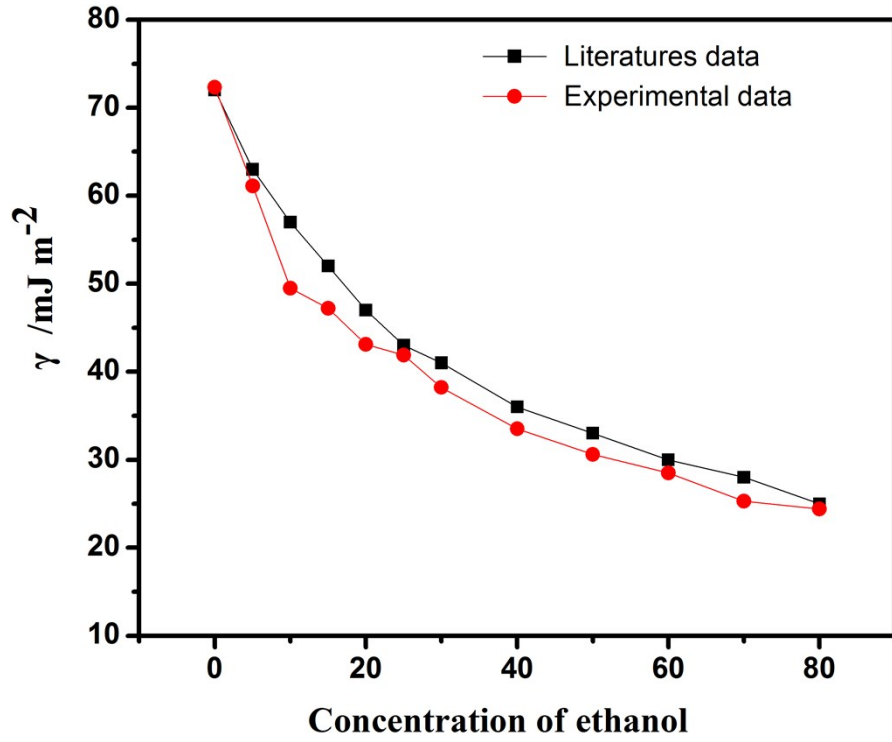

Figure S2 The surface tension values of different concentration ethanol/water mixed solution

Table S1 EDX element content analysis.

| Element | X <sub>OH</sub> =0 (%) | X <sub>OH</sub> =0.3 (%) | X <sub>OH</sub> =0.5 (%) | X <sub>OH</sub> =0.7 (%) | X <sub>OH</sub> =1.0 (%) |
|---------|------------------------|--------------------------|--------------------------|--------------------------|--------------------------|
| C       | 80.8                   | 78.5                     | 73.4                     | 53.8                     | 44.0                     |
| O       | 7.2                    | 9.8                      | 12.2                     | 24.1                     | 26.9                     |
| S       | 6.9                    | 6.5                      | 7.3                      | 7.2                      | 8.3                      |

Table S2 Dynamic CA of the samples,  $\theta_A$  is advancing angle,  $\theta_R$  is receding angle,  $\theta_H$  is CA hysteresis,  $\theta_S$  is sliding angle.

| X <sub>OH</sub> | $\theta_A$ (°) | $\theta_R$ (°) | $\theta_H$ (°) | $\theta_S$ (°) |
|-----------------|----------------|----------------|----------------|----------------|
| 0.5             | 150.3          | 122.5          | 27.8           | 26.6           |
| 0.7             | 156.6          | 148.2          | 8.4            | 6.3            |
| 1.0             | /              | /              | /              | /              |
